# Supplementary material for: A Non-Randomized Trial Investigating the Impact of Brown Rice Consumption on Gut Microbiota, Attention, and Short-Term Working Memory in Thai School-Aged Children
Source: MDPI journal article supplement (doi:10.3390/nu14235176), 2022-12-05
Supplement: s1 [file s1]

**Table S1** Primer pairs targeting bacterial 16S rRNA genes

| Target microorganism <sup>a</sup> | Primer sequence (5'→3') <sup>b,c</sup>              | Product size (bp) | Ta | Efficiency (%) | Reference                                                  |
|-----------------------------------|-----------------------------------------------------|-------------------|----|----------------|------------------------------------------------------------|
| Total bacteria (Universal 180)    | F: AAACCTCAAAGGAATTGACGG<br>R: CTCACRRCACGAGCTGAC   | 180               | 60 | 91             | (Bacchetti De Gregoris et al. 2011) [80]                   |
| Firmicutes (P)                    | F: TGAAACTYAAAGGAATTGACG<br>R: ACCATGCACCACCTGTC    | 200               | 64 | 87             | (Bacchetti De Gregoris et al. 2011) [80]                   |
| Bacteroidetes (P)                 | F: CRAACAGGATTAGATACCCT<br>R: GGTAAGGTTCTCGCGTAT    | 240               | 64 | 74             | (Bacchetti De Gregoris et al. 2011) [80]                   |
| $\gamma$ -Proteobacteria (C)      | F: TCGTCAGCTCGTGTGTGTA<br>R: CGTAAGGGCCATGATG       | 170               | 53 | 74             | (Bacchetti De Gregoris et al. 2011) [80]                   |
| <i>Prevotella</i> spp. (G)        | F: GGTTCTGAGAGGAAGGTCCCC<br>R: TCCTGCACGCTACTTGGCTG | 267               | 56 | 81             | (Stevenson and Weimer 2007) [81]                           |
| <i>Roseburia</i> (G)              | F: GCGGTRCGGCAAGTCTGA<br>R: CCTCCGACACTCTAGTMCGAC   | 80                | 55 | 86             | (Walker et al. 2005; Ramirez-Farias et al. 2008) [82,83]   |
| <i>Ruminococcus</i> (G)           | F: GCGGCTCTCTGGGCTTT<br>R: CCAGGTGGATWACTTATTGTGTAA | 156               | 63 | 68             | (Ramirez-Farias et al. 2008) [83]                          |
| <i>Faecalibacterium</i> (G)       | F: GGAGGAAGAAGGTCTTCGG<br>R: AATTCCGCCTACCTCTGCACT  | 247               | 63 | 79             | (Ramirez-Farias et al. 2008; Wang et al. 1996) [83,84]     |
| <i>Bacteroides</i> (G)            | F: GAAGGTCCCCCACATTG<br>R: CGCKACTTGGCTGGTTCAG      | 103               | 64 | 89             | (Ramirez-Farias et al. 2008; Bartosch et al. 2004) [83,85] |
| <i>Akkermansia</i> (G)            | F: CAGCACGTGAAGGTGGGGAC<br>R: CCTTGCGGTTGGCTTCAGAT  | 349               | 60 | 91             | (Collado et al. 2007) [86]                                 |
| <i>Bifidobacteria</i> (G)         | F: TCGCGTCYGGTGTGAAAG<br>R: GGTGTTCTTCCCAGATATCTACA | 601               | 64 | 79             | (Matsuki et al. 2002; Rinttila et al. 2004) [87,88]        |
| <i>Lactobacillus</i> spp. (G)     | F: AGCAGTAGGGAATCTTCCA<br>R: CACCGCTACACATGGAG      | 341               | 56 | 84             | (Walter et al. 2001; Heilig et al. 2002) [89,90]           |

Note: <sup>a</sup>P=phylum, C=class and G=genus; <sup>b</sup>F and R represent forward and reverse primers, respectively.

<sup>c</sup>Degenerate base covering: R = A/G; Y = T/C; M = A/C; W = A/T; K = T/G

## References:

- De Gregoris, T.B.; Aldred, N.; Clare, A.S.; Burgess, J.C. Improvement of phylum- and class-specific primers for real-time PCR quantification of bacterial taxa. *J. Microbiol. Methods*. **2011**, *86*, 351–356, <https://doi.org/10.1016/j.mimet.2011.06.010>.

81. Stevenson, D.M.; Weimer, P.J. Dominance of Prevotella and low abundance of classical ruminal bacterial species in the bovine rumen revealed by relative quantification real-time PCR. *Appl. Microbiol. Biotechnol.* **2007**, *75*, 165–174, <https://doi.org/10.1007/s00253-006-0802-y>.
82. Walker, A.W.; Duncan, S.H.; McWilliam Leitch, E.C.; Child, M.W.; Flint, H.J. pH and Peptide Supply Can Radically Alter Bacterial Populations and Short-Chain Fatty Acid Ratios within Microbial Communities from the Human Colon. *Appl. Environ. Microbiol.* **2005**, *71*, 3692–3700, <https://doi.org/10.1128/aem.71.7.3692-3700.2005>.
83. Ramirez-Farias, C.; Slezak, K.; Fuller, Z.; Duncan, A.; Holtrop, G.; Louis, P. Effect of inulin on the human gut microbiota: Stimulation of Bifidobacterium adolescentis and Faecalibacterium prausnitzii. *Br. J. Nutr.* **2009**, *101*, 541–550, <https://doi.org/10.1017/s0007114508019880>.
84. Wang, R.F.; Cao, W.W.; Cerniglia, C.E. PCR detection and quantitation of predominant anaerobic bacteria in human and animal fecal samples. *Appl. Environ. Microbiol.* **1996**, *62*, 1242–1247, <https://doi.org/10.1128/aem.62.4.1242-1247.1996>.
85. Bartosch, S.; Fite, A.; Macfarlane, G.T.; McMurdo, M.E.T. Characterization of Bacterial Communities in Feces from Healthy Elderly Volunteers and Hospitalized Elderly Patients by Using Real-Time PCR and Effects of Antibiotic Treatment on the Fecal Microbiota. *Appl. Environ. Microbiol.* **2004**, *70*, 3575–3581, <https://doi.org/10.1128/aem.70.6.3575-3581.2004>.
86. Collado, M.C.; Derrien, M.; Isolauri, E.; de Vos, W.M.; Salminen, S. Intestinal Integrity and Akkermansia muciniphila, a Mucin-Degrading Member of the Intestinal Microbiota Present in Infants, Adults, and the Elderly. *Appl. Environ. Microbiol.* **2007**, *73*, 7767–7770, <https://doi.org/10.1128/aem.01477-07>.
87. Matsuki, T.; Watanabe, K.; Fujimoto, J.; Miyamoto, Y.; Takada, T.; Matsumoto, K.; Oyaizu, H.; Tanaka, R. Development of 16S rRNA-Gene-Targeted Group-Specific Primers for the Detection and Identification of Predominant Bacteria in Human Feces. *Appl. Environ. Microbiol.* **2002**, *68*, 5445–5451, <https://doi.org/10.1128/aem.68.11.5445-5451.2002>.
88. Rinttilä, T.; Kassinen, A.; Malinen, E.; Krogus, L.; Palva, A. Development of an extensive set of 16S rDNA-targeted primers for quantification of pathogenic and indigenous bacteria in faecal samples by real-time PCR. *J. Appl. Microbiol.* **2004**, *97*, 1166–1177, <https://doi.org/10.1111/j.1365-2672.2004.02409.x>.
89. Walter, J.; Hertel, C.; Tannock, G.W.; Lis, C.M.; Munro, K.; Hammes, W.P. Detection of Lactobacillus, Pediococcus, Leuconostoc, and Weissella Species in Human Feces by Using Group-Specific PCR Primers and Denaturing Gradient Gel Electrophoresis. *Appl. Environ. Microbiol.* **2001**, *67*, 2578–2585, <https://doi.org/10.1128/aem.67.6.2578-2585.2001>.
90. Heilig, H.G.; Zoetendal, E.G.; Vaughan, E.E.; Marteau, P.; Akkermans, A.D.; de Vos, W.M. Molecular Diversity of Lactobacillus spp. and Other Lactic Acid Bacteria in the Human Intestine as Determined by Specific Amplification of 16S Ribosomal DNA. *Appl. Environ. Microbiol.* **2002**, *68*, 114–23, <https://doi.org/10.1128/aem.68.1.114-123.2002>.

**Table S2** Demographics of school-aged children in the control and intervention groups at baseline

| Demographic variables    | mean (sd)     |               | p-value  | Test                   |
|--------------------------|---------------|---------------|----------|------------------------|
|                          | WR (n = 33)   | SLR (n = 52)  |          |                        |
| Age (years)              | 7.02 (0.71)   | 10.52 (0.82)  | < 0.0001 | Wilcoxon rank sum test |
| Gender (n, boys/girls)   | 14/19         | 17/35         | 0.49     | Fisher's exact test    |
| Weight (kg)              | 27.36 (11.2)  | 40.18 (10.99) | < 0.0001 | Wilcoxon rank sum test |
| Height (cm)              | 122.11 (8.15) | 144.68 (8.88) | < 0.0001 | t-test                 |
| BMI (kg/m2 )             | 17.9 (4.99)   | 18.97 (3.93)  | 0.03     | Wilcoxon rank sum test |
| <b>BMI zscore (n)</b>    |               |               |          |                        |
| Severe thinness          | 0             | 0             | 0.42     | Fisher's exact test    |
| Thinness                 | 0             | 3             |          |                        |
| Normal                   | 20            | 32            |          |                        |
| Overweight (OV)          | 6             | 11            |          |                        |
| Obese (OB)               | 7             | 6             |          |                        |
| <b>Ethnicity (n)</b>     |               |               |          |                        |
| Akha                     | 11            | 15            | 0.98     | Fisher's exact test    |
| Chinese                  | 9             | 14            |          |                        |
| Lahu                     | 1             | 1             |          |                        |
| Thai                     | 5             | 9             |          |                        |
| Thai Yai                 | 7             | 13            |          |                        |
| <b>Delivery mode (n)</b> |               |               |          |                        |
| Vaginal delivery         | 18            | 35            | 0.26     | Fisher's exact test    |
| Caesarean section        | 15            | 17            |          |                        |
| <b>Feeding type (n)</b>  |               |               |          |                        |
| Breastfeeding            | 22            | 47            | 0.02     | Fisher's exact test    |
| Formular feeding         | 8             | 3             |          |                        |
| Mixed feeding            | 3             | 2             |          |                        |

A *p*-value less than 0.05 is statistically significant. Abbreviations: WR, white rice; SLR, Sinlek rice.

**Table S3** Demographics of school-aged children in the control and intervention groups at week 4

| Demographic variables  | mean (sd)     |               | p-value  | Test                   |
|------------------------|---------------|---------------|----------|------------------------|
|                        | WR (n = 33)   | SLR (n = 52)  |          |                        |
| Age (years)            | 7.08 (0.67)   | 10.6 (0.85)   | < 0.0001 | Wilcoxon rank sum test |
| Gender (n, boys/girls) | 14/19         | 17/35         | 0.49     | Fisher's exact test    |
| Weight (kg)            | 27.36 (11.62) | 42.54 (10.67) | < 0.0001 | Wilcoxon rank sum test |
| Height (cm)            | 123.64 (8.28) | 146.44 (9.12) | < 0.0001 | t-test                 |
| BMI (kg/m2 )           | 18.3 (5.01)   | 19.6 (3.71)   | 0.005    | Wilcoxon rank sum test |
| BMI zscore (n)         |               |               |          |                        |
| Severe thinness        | 0             | 0             | 0.5      | Fisher's exact test    |
| Thinness               | 0             | 0             |          |                        |
| Normal                 | 21            | 33            |          |                        |
| Overweight (OV)        | 5             | 12            |          |                        |
| Obese (OB)             | 7             | 7             |          |                        |
| Ethnicity (n)          |               |               |          |                        |
| Akha                   | 11            | 15            | 0.98     | Fisher's exact test    |
| Chinese                | 9             | 14            |          |                        |
| Lahu                   | 1             | 1             |          |                        |
| Thai                   | 5             | 9             |          |                        |
| Thai Yai               | 7             | 13            |          |                        |
| Delivery mode (n)      |               |               |          |                        |
| Vaginal delivery       | 18            | 35            | 0.26     | Fisher's exact test    |
| Caesarean section      | 15            | 17            |          |                        |
| Feeding type (n)       |               |               |          |                        |
| Breastfeeding          | 22            | 47            | 0.02     | Fisher's exact test    |
| Formular feeding       | 8             | 3             |          |                        |
| Mixed feeding          | 3             | 2             |          |                        |

A *p*-value less than 0.05 is statistically significant. Abbreviations: WR, white rice; SLR, Sinlek rice.

**Table S4** Demographics of school-aged children in the control and intervention groups at week 15

| Demographic variables    | mean (sd)     |               | <i>p</i> -value | Test                   |
|--------------------------|---------------|---------------|-----------------|------------------------|
|                          | WR (n = 33)   | SLR (n = 52)  |                 |                        |
| Age (years)              | 7.23 (0.71)   | 10.8 (0.85)   | < 0.0001        | Wilcoxon rank sum test |
| Gender (n, boys/girls)   | 14/19         | 17/35         | 0.49            | Fisher's exact test    |
| Weight (kg)              | 29.24 (11.35) | 42.54 (10.67) | < 0.0001        | Wilcoxon rank sum test |
| Height (cm)              | 123.88 (8.23) | 146.65 (9.12) | < 0.0001        | t-test                 |
| BMI (kg/m <sup>2</sup> ) | 18.6 (4.87)   | 19.7 (3.73)   | 0.01            | Wilcoxon rank sum test |
| <b>BMI zscore (n)</b>    |               |               |                 |                        |
| Severe thinness          | 0             | 0             |                 |                        |
| Thinness                 | 1             | 0             |                 |                        |
| Normal                   | 18            | 33            | 0.54            | Fisher's exact test    |
| Overweight (OV)          | 7             | 11            |                 |                        |
| Obese (OB)               | 7             | 8             |                 |                        |
| <b>Ethnicity (n)</b>     |               |               |                 |                        |
| Akha                     | 11            | 15            |                 |                        |
| Chinese                  | 9             | 14            |                 |                        |
| Lahu                     | 1             | 1             | 0.98            | Fisher's exact test    |
| Thai                     | 5             | 9             |                 |                        |
| Thai Yai                 | 7             | 13            |                 |                        |
| <b>Delivery mode (n)</b> |               |               |                 |                        |
| Vaginal delivery         | 18            | 35            | 0.26            | Fisher's exact test    |
| Caesarean section        | 15            | 17            |                 |                        |
| <b>Feeding type (n)</b>  |               |               |                 |                        |
| Breastfeeding            | 22            | 47            |                 |                        |
| Formular feeding         | 8             | 3             | 0.02            | Fisher's exact test    |
| Mixed feeding            | 3             | 2             |                 |                        |

A *p*-value less than 0.05 is statistically significant. Abbreviations: WR, white rice; SLR, Sinlek rice.

**Table S5** Demographics of school-aged children in the control and intervention groups at week 56

| Demographic variables    | mean (sd)     |               | <i>p</i> -value | Test                   |
|--------------------------|---------------|---------------|-----------------|------------------------|
|                          | WR (n = 39)   | SLR (n = 18)  |                 |                        |
| Age (years)              | 11.38 (0.61)  | 7.66 (0.48)   | < 0.0001        | Wilcoxon rank sum test |
| Gender (n, boys/girls)   | 16/23         | 8/10          | 1               | Fisher's exact test    |
| Weight (kg)              | 43.49 (11.12) | 27.89 (9.62)  | < 0.0001        | Wilcoxon rank sum test |
| Height (cm)              | 144.22 (8.29) | 121.81 (7.48) | < 0.0001        | Wilcoxon rank sum test |
| BMI (kg/m <sup>2</sup> ) | 20.7 (3.87)   | 18.49 (4.46)  | 0.01            | Wilcoxon rank sum test |
| <b>BMI zscore (n)</b>    |               |               |                 |                        |
| Severe thinness          | 0             | 0             |                 |                        |
| Thinness                 | 0             | 0             |                 |                        |
| Normal                   | 19            | 10            | 0.55            | Fisher's exact test    |
| Overweight (OV)          | 14            | 4             |                 |                        |
| Obese (OB)               | 6             | 4             |                 |                        |
| <b>Ethnicity (n)</b>     |               |               |                 |                        |
| Akha                     | 9             | 5             |                 |                        |
| Chinese                  | 13            | 6             |                 |                        |
| Lahu                     | 1             | 1             | 0.48            | Fisher's exact test    |
| Thai                     | 9             | 1             |                 |                        |
| Thai Yai                 | 7             | 5             |                 |                        |
| <b>Delivery mode (n)</b> |               |               |                 |                        |
| Vaginal delivery         | 26            | 10            | 0.56            | Fisher's exact test    |
| Caesarean section        | 13            | 8             |                 |                        |
| <b>Feeding type (n)</b>  |               |               |                 |                        |
| Breastfeeding            | 37            | 11            |                 |                        |
| Formular feeding         | 1             | 4             | 0.004           | Fisher's exact test    |
| Mixed feeding            | 1             | 3             |                 |                        |

A *p*-value less than 0.05 is statistically significant. Abbreviations: WR, white rice; SLR, Sinlek rice.

**Table S6** Demographics of school-aged children in the control and intervention groups at week 61

| Demographic variables    | mean (sd)     |               | <i>p</i> -value | Test                   |
|--------------------------|---------------|---------------|-----------------|------------------------|
|                          | WR (n = 39)   | SLR (n = 18)  |                 |                        |
| Age (years)              | 11.43 (0.62)  | 7.67 (0.47)   | < 0.0001        | Wilcoxon rank sum test |
| Gender (n, boys/girls)   | 16/23         | 8/10          | 1               | Fisher's exact test    |
| Weight (kg)              | 44 (11.36)    | 28.06 (9.66)  | < 0.0001        | Wilcoxon rank sum test |
| Height (cm)              | 146.05 (9.47) | 121.81 (7.48) | < 0.0001        | Wilcoxon rank sum test |
| BMI (kg/m <sup>2</sup> ) | 20.49 (3.87)  | 18.61 (4.44)  | 0.03            | Wilcoxon rank sum test |
| <b>BMI zscore (n)</b>    |               |               |                 |                        |
| Severe thinness          | 1             | 0             |                 |                        |
| Thinness                 | 0             | 0             |                 |                        |
| Normal                   | 19            | 10            | 0.66            | Fisher's exact test    |
| Overweight (OV)          | 14            | 4             |                 |                        |
| Obese (OB)               | 5             | 4             |                 |                        |
| <b>Ethnicity (n)</b>     |               |               |                 |                        |
| Akha                     | 9             | 5             |                 |                        |
| Chinese                  | 13            | 6             |                 |                        |
| Lahu                     | 1             | 1             | 0.48            | Fisher's exact test    |
| Thai                     | 9             | 1             |                 |                        |
| Thai Yai                 | 7             | 5             |                 |                        |
| <b>Delivery mode (n)</b> |               |               |                 |                        |
| Vaginal delivery         | 26            | 10            | 0.56            | Fisher's exact test    |
| Caesarean section        | 13            | 8             |                 |                        |
| <b>Feeding type (n)</b>  |               |               |                 |                        |
| Breastfeeding            | 37            | 11            |                 |                        |
| Formular feeding         | 1             | 4             | 0.004           | Fisher's exact test    |
| Mixed feeding            | 1             | 3             |                 |                        |

A *p*-value less than 0.05 is statistically significant. Abbreviations: WR, white rice; SLR, Sinlek rice.

**Table S7** Demographics of school-aged children in the control and intervention groups at week 71

| Demographic variables    | mean (sd)     |               | <i>p</i> -value | Test                   |
|--------------------------|---------------|---------------|-----------------|------------------------|
|                          | WR (n = 39)   | SLR (n = 18)  |                 |                        |
| Age (years)              | 11.57 (0.55)  | 7.8 (0.44)    | < 0.0001        | Wilcoxon rank sum test |
| Gender (n, boys/girls)   | 16/23         | 8/10          | 1               | Fisher's exact test    |
| Weight (kg)              | 44.03 (11.6)  | 28.39 (9.38)  | < 0.0001        | Wilcoxon rank sum test |
| Height (cm)              | 146.06 (9.49) | 121.86 (7.49) | < 0.0001        | Wilcoxon rank sum test |
| BMI (kg/m <sup>2</sup> ) | 20.51 (4.31)  | 18.85 (4.37)  | 0.07            | Wilcoxon rank sum test |
| <b>BMI zscore (n)</b>    |               |               |                 |                        |
| Severe thinness          | 1             | 0             |                 |                        |
| Thinness                 | 0             | 0             |                 |                        |
| Normal                   | 20            | 7             | 0.66            | Fisher's exact test    |
| Overweight (OV)          | 13            | 7             |                 |                        |
| Obese (OB)               | 5             | 4             |                 |                        |
| <b>Ethnicity (n)</b>     |               |               |                 |                        |
| Akha                     | 9             | 5             |                 |                        |
| Lahu                     | 13            | 6             |                 |                        |
| Chinese                  | 1             | 1             | 0.48            | Fisher's exact test    |
| Thai                     | 9             | 1             |                 |                        |
| Thai Yai                 | 7             | 5             |                 |                        |
| <b>Delivery mode (n)</b> |               |               |                 |                        |
| Vaginal delivery         | 26            | 10            | 0.56            | Fisher's exact test    |
| Caesarean section        | 13            | 8             |                 |                        |
| <b>Feeding type (n)</b>  |               |               |                 |                        |
| Breastfeeding            | 37            | 11            |                 |                        |
| Formular feeding         | 1             | 4             | 0.004           | Fisher's exact test    |
| Mixed feeding            | 1             | 3             |                 |                        |

A *p*-value less than 0.05 is statistically significant. Abbreviations: WR, white rice; SLR, Sinlek rice.
